# Supplementary material for: Significant enhancement of optical absorption through nano-structuring of copper based oxide semiconductors: possible future materials for solar energy applications
Source: Royal Society of Chemistry journal article supplement (doi:10.1039/c4cp00827h), 2014-01-01
Supplement: c4cp00827h1.pdf [file c4cp00827h1.pdf]

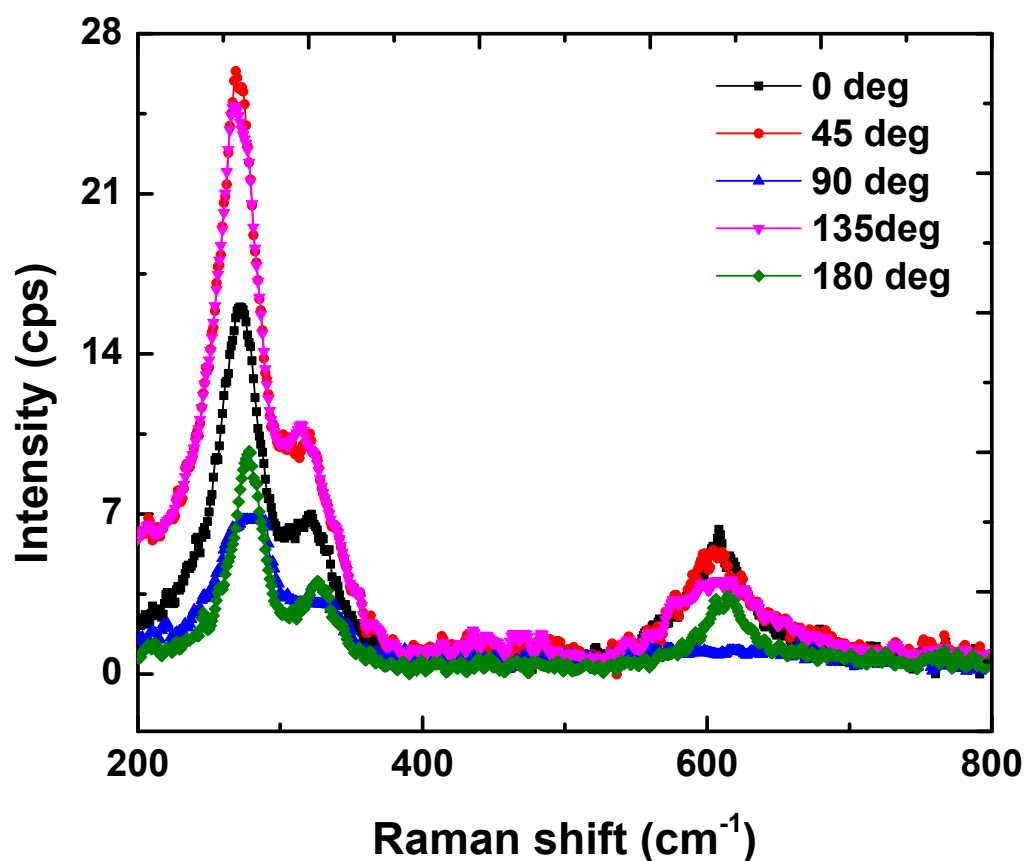

**Figure 1:** Polarized Raman spectra of synthesized copper oxide nanostructure. The polarizer angle was varied from 0 degrees to 180 degrees in steps of 45 degrees. It can be seen that the Raman intensity is maximum at 45 degrees and 135 degrees. The Raman active mode  $B_{2g}$  is completely suppressed at 90 degrees.

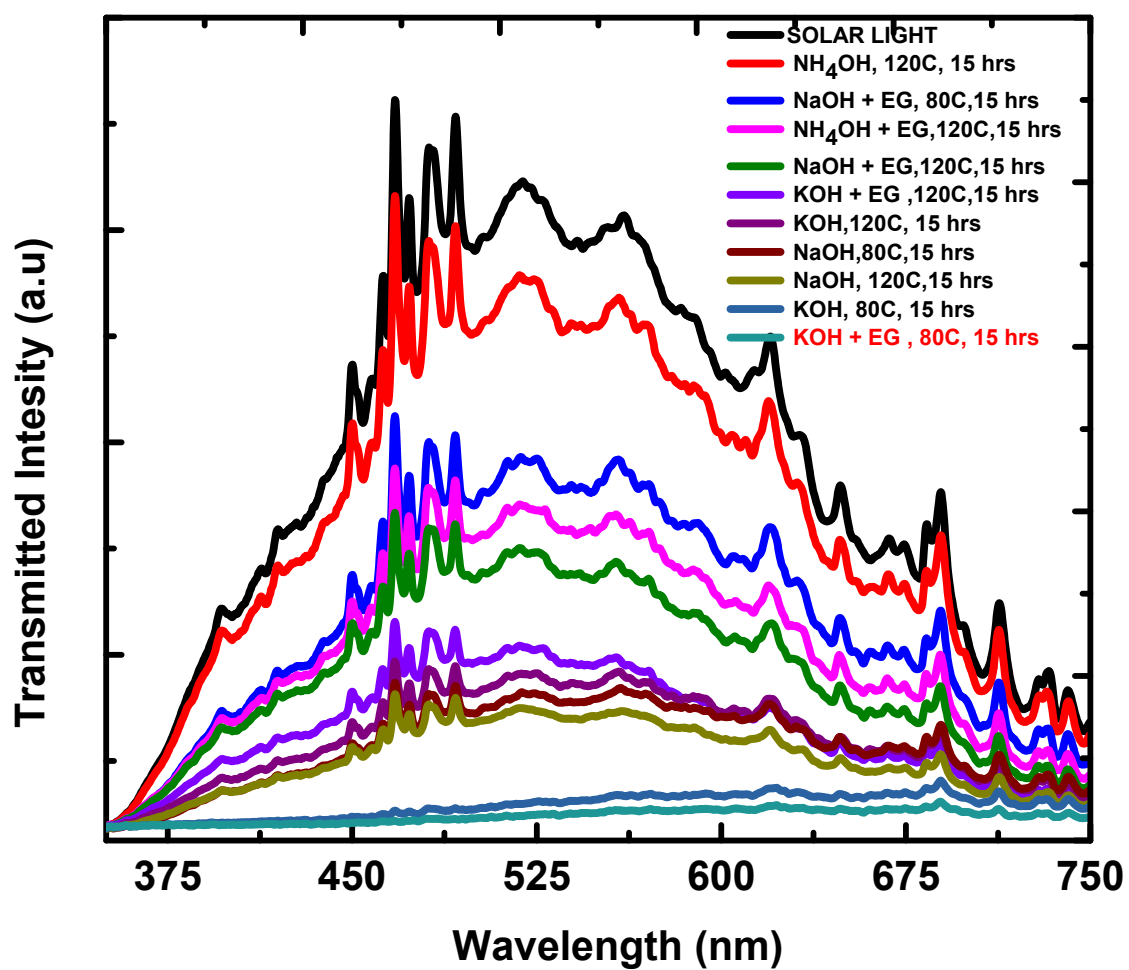

**Figure 2:** Stacked Solar transmitted spectra of synthesized copper oxides nanostructures. The nature of the plot is an indicative of the varied optical band gap of the prepared samples.
